# Supplementary material for: High night temperature strongly impacts TCA cycle, amino acid and polyamine biosynthetic pathways in rice in a sensitivity-dependent manner
Source: PubMed Central journal article supplement (PMC4588888; doi:10.1093/jxb/erv352), 2015-07-23
Supplement: supp_erv352_jexbot149401_file001.pdf [file supp_erv352_jexbot149401_file001.pdf]

## High night temperature strongly impacts TCA cycle, amino acid and polyamine biosynthetic pathways in rice in a sensitivity dependent manner

Ulrike Glaubitz, Alexander Erban, Joachim Kopka, Dirk K. Hincha, Ellen Zuther

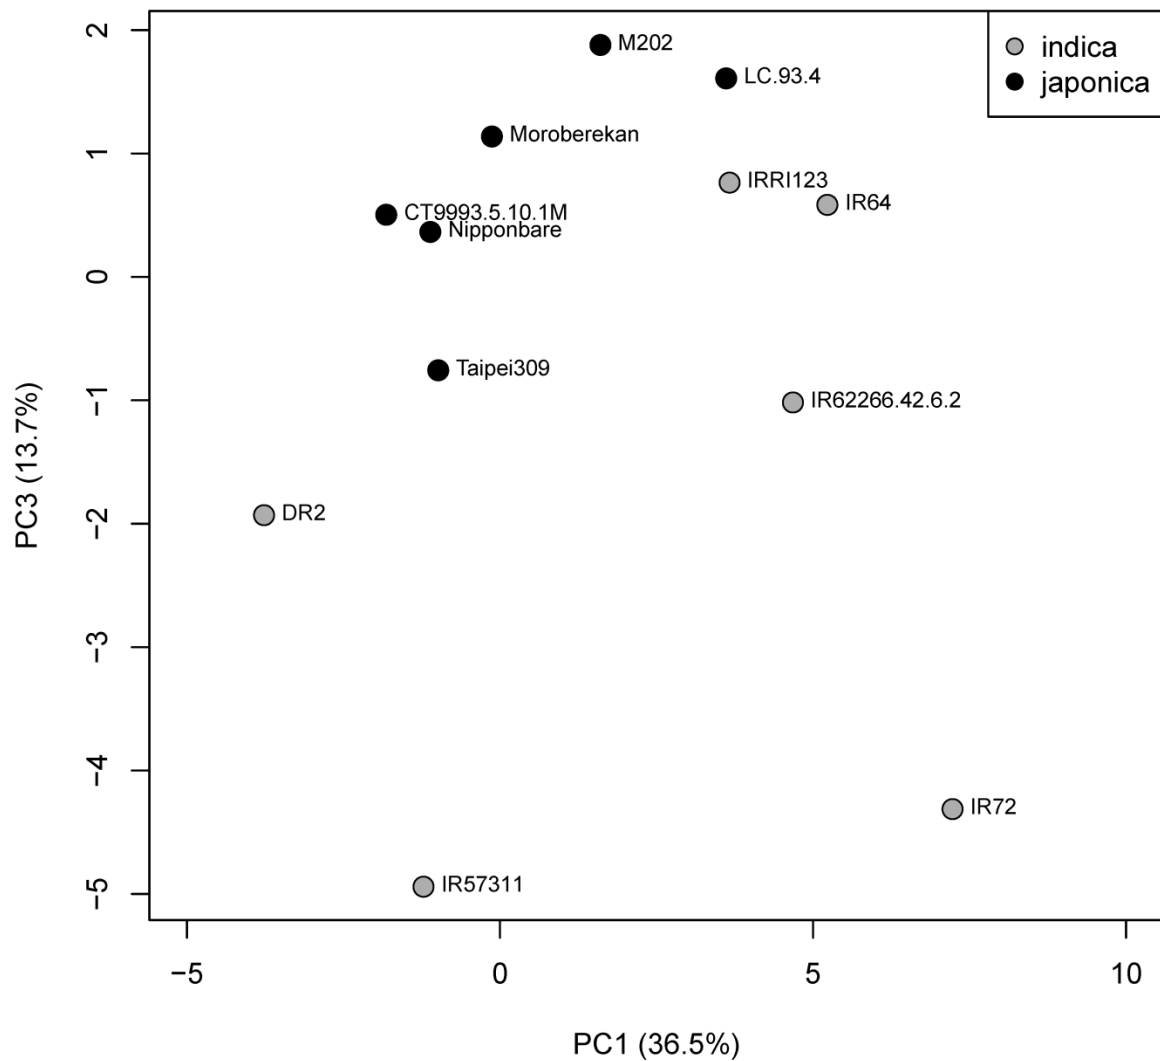

### Supplementary Figure S1

Principal Component Analysis (PCA) of metabolite profiles measured by GC-MS after 48 DAS under control conditions in 12 cultivars of rice.

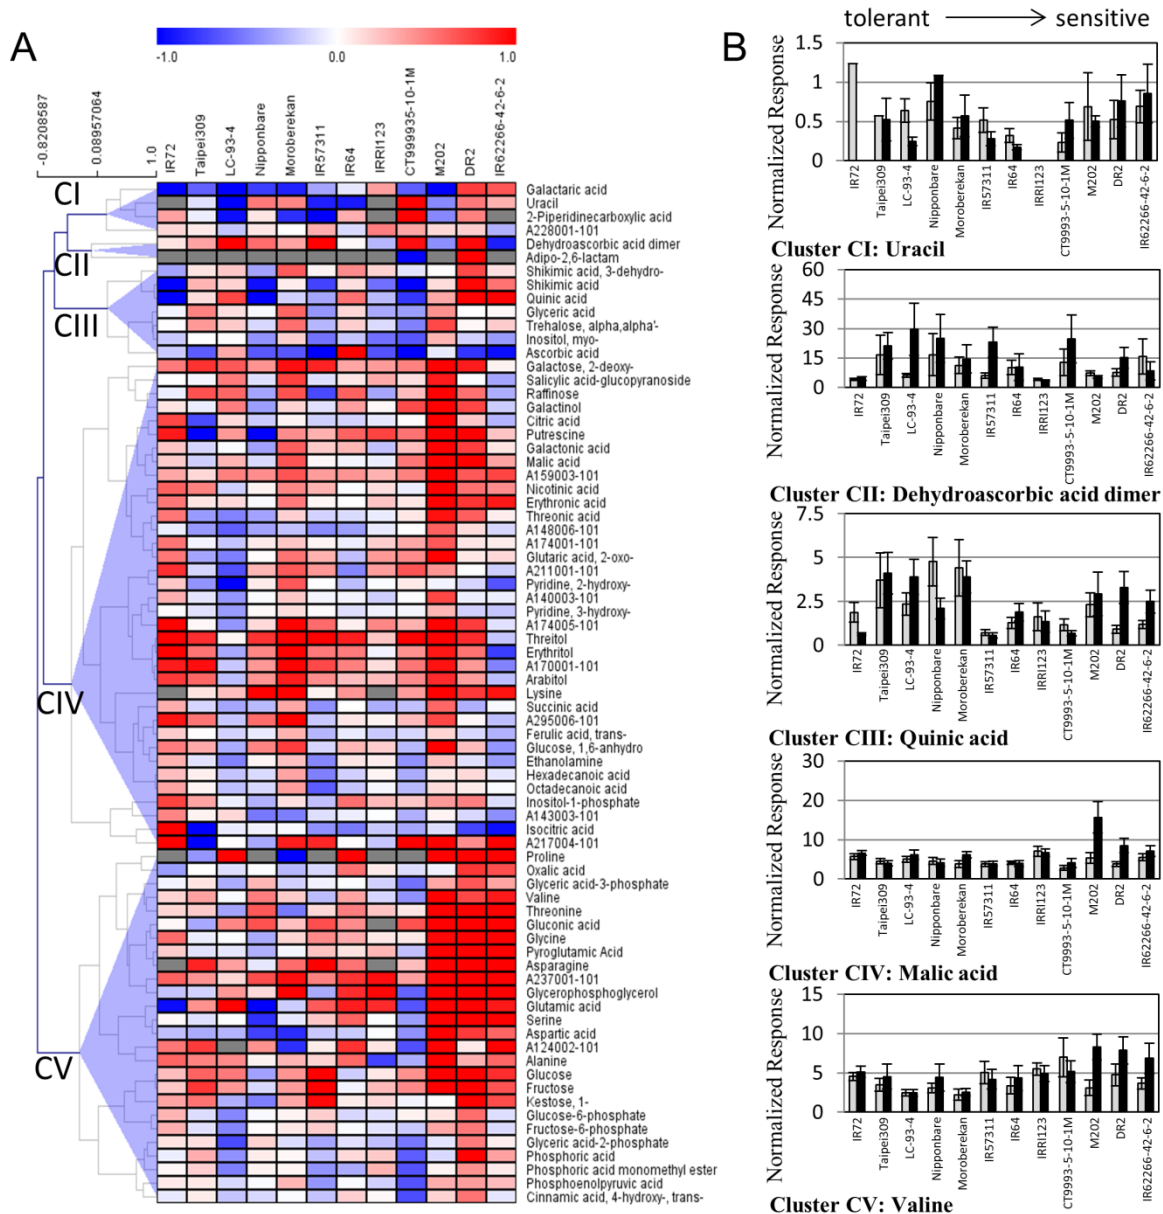

### Supplementary Figure S2

(A) Hierarchical cluster analysis (HCA) with Pearson correlation used for  $\log_2$  fold changes of 75 metabolites measured by GC-MS after 23 days (48 DAS) of HNT in comparison to control conditions in 12 cultivars of rice. (B) Normalized responses of selected metabolites represent the response patterns of clusters CI to CV.

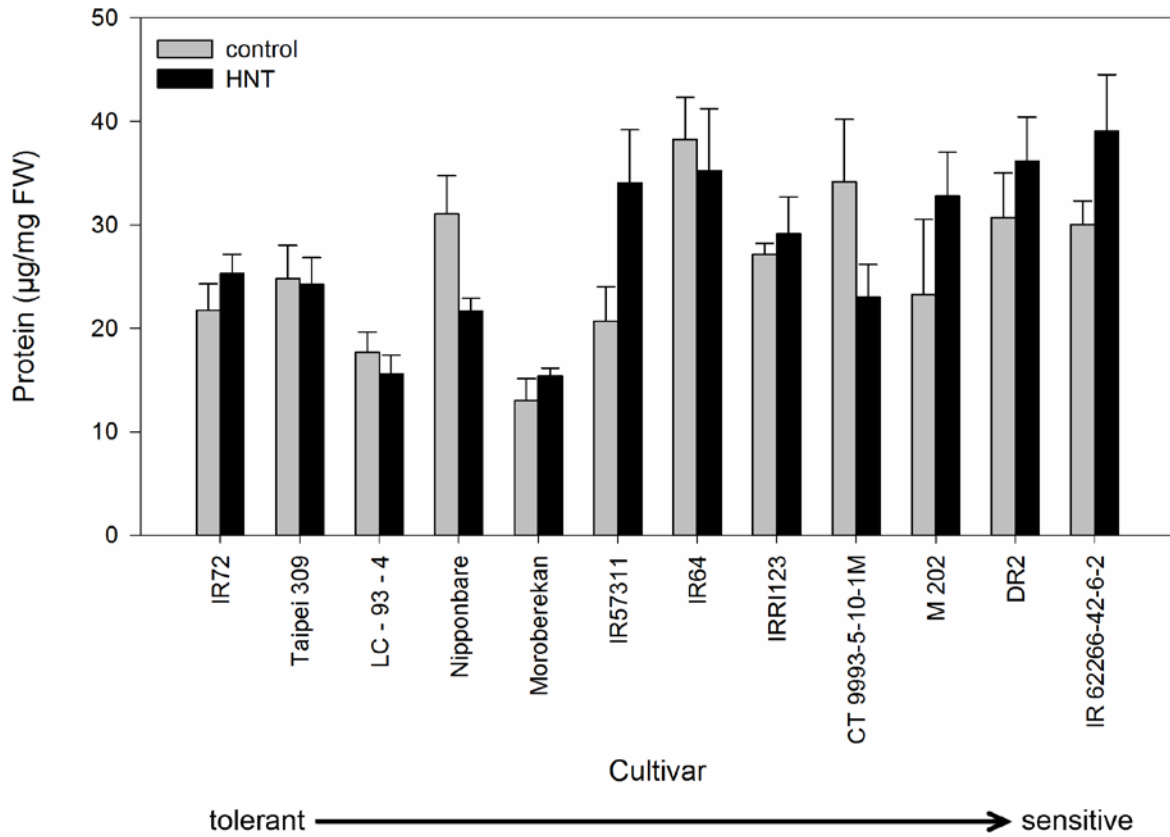

### Supplementary Figure S3

Protein content in leaves of 12 rice cultivars after 48 DAS under control and 23 days (48 DAS) under HNT

**Supplementary Table 1.** Cultivars of *Oryza sativa* L. used for HNT stress experiments. Seeds with two origins were propagated in the latter one.

| <b>Cultivar</b> | <b>Species</b>                    | <b>Origin</b>      | <b>Mean Rank</b> |                                                                                      |           |
|-----------------|-----------------------------------|--------------------|------------------|--------------------------------------------------------------------------------------|-----------|
| IR72            | <i>Oryza sativa ssp. indica</i>   | IRRI               | 4.1              | tolerant                                                                             |           |
| Taipei 309      | <i>Oryza sativa ssp. japonica</i> | IRRI, MPIMP        | 7.5              |  |           |
| LC-93-4         | <i>Oryza sativa ssp. japonica</i> | IBT Vietnam, MPIMP | 10.3             |                                                                                      |           |
| Nipponbare      | <i>Oryza sativa ssp. japonica</i> | IRRI, MPIMP        | 10.4             |                                                                                      |           |
| Moroberekan     | <i>Oryza sativa ssp. japonica</i> | IRRI               | 14.3             |                                                                                      |           |
| IR57311         | <i>Oryza sativa ssp. indica</i>   | IRRI, MPIMP        | 19.1             |                                                                                      |           |
| IR64            | <i>Oryza sativa ssp. indica</i>   | IRRI, MPIMP        | 20.8             |                                                                                      |           |
| IRRI123         | <i>Oryza sativa ssp. indica</i>   | IRRI               | 26.5             |                                                                                      |           |
| CT9993-5-10-1   | <i>Oryza sativa ssp. japonica</i> | IRRI, MPIMP        | 26.5             |                                                                                      |           |
| M202            | <i>Oryza sativa ssp. japonica</i> | IRRI               | 44.1             |                                                                                      |           |
| DR2             | <i>Oryza sativa ssp. indica</i>   | IBT Vietnam, MPIMP | 45.2             |                                                                                      |           |
| IR62266-42-6-2  | <i>Oryza sativa ssp. indica</i>   | IRRI, MPIMP        | 45.5             |                                                                                      | sensitive |

**Supplementary Table 3.** Top ten most positive and negative loadings of PC1 and PC3 separating *indica* and *japonica* cultivars in a PCA of metabolite profiles measured by GC-MS after 48 DAS under control conditions.

| PC1                            |        | PC3                                       |        |
|--------------------------------|--------|-------------------------------------------|--------|
| Galactaric_acid                | 0.717  | Adipo_26_lactam                           | 0.380  |
| Adipo_26_lactam                | 0.218  | Fructose                                  | 0.338  |
| Raffinose                      | 0.124  | A217004_101                               | 0.335  |
| Gluconic_acid                  | 0.089  | Glucose                                   | 0.319  |
| Cinnamic_acid_4_hydroxy_trans  | 0.086  | Kestose_1_                                | 0.294  |
| Uracil                         | 0.068  | Proline                                   | 0.197  |
| Glyceric_acid                  | 0.059  | Quinic_acid                               | 0.188  |
| Galactinol                     | 0.049  | Galactaric_acid                           | 0.165  |
| A228001_101                    | 0.047  | Shikimic_acid                             | 0.163  |
| Shikimic_acid_3_dehydro        | 0.045  | A140003_101                               | 0.152  |
| Salicylic_acid_glucopyranoside | 0.042  | Galactose_2_deoxy                         | 0.088  |
| Erythritol                     | 0.038  | Glycine                                   | 0.079  |
| Glutamic_acid                  | 0.036  | Inositol_myo_                             | 0.076  |
| Glutaric_acid_2_oxo            | 0.029  | A237001_101                               | 0.072  |
| Asparagine                     | 0.028  | Cinnamic_acid_4_hydroxy_trans             | 0.069  |
| Malic_acid                     | 0.028  | A174005_101                               | 0.055  |
| Dehydroascorbic_acid_dimer     | 0.021  | Glutaric_acid_2_oxo                       | 0.053  |
| Glyceric_acid_3_phosphate      | 0.021  | Ferulic_acid_trans                        | 0.050  |
| Arabitol                       | 0.019  | A211001_101                               | 0.049  |
| Glyceric_acid_2_phosphate      | 0.018  | Inositol_1_phosphate                      | 0.045  |
| Inositol_1_phosphate           | -0.014 | Shikimic_acid_3_dehydro                   | -0.046 |
| Fructose_6_phosphate           | -0.016 | A124002_101                               | -0.050 |
| Alanine                        | -0.017 | Pyroglutamic acid;Glutamine;Glutamic acid | -0.058 |
| Octadecanoic_acid              | -0.017 | Citric_acid                               | -0.060 |
| Aspartic_acid                  | -0.021 | Threonine                                 | -0.061 |
| Pyridine_3_hydroxy             | -0.022 | Phosphoenolpyruvic_acid                   | -0.065 |
| Nicotinic_acid                 | -0.023 | Glyceric_acid_2_phosphate                 | -0.071 |
| 2_Piperidinecarboxylic_acid    | -0.023 | Glyceric_acid_3_phosphate                 | -0.072 |
| Ethanolamine                   | -0.025 | Glucose_16_anhydro                        | -0.073 |
| A143003_101                    | -0.026 | Valine                                    | -0.082 |
| Isocitric_acid                 | -0.033 | Ascorbic_acid                             | -0.083 |
| Threonine                      | -0.042 | Oxalic_acid                               | -0.087 |
| Lysine                         | -0.045 | Uracil                                    | -0.095 |
| Valine                         | -0.046 | Isocitric_acid                            | -0.110 |
| Inositol_myo_                  | -0.047 | Aspartic_acid                             | -0.114 |
| Glycerophosphoglycerol         | -0.055 | Glutamic_acid                             | -0.129 |
| Ascorbic_acid                  | -0.106 | Glycerophosphoglycerol                    | -0.131 |
| A140003_101                    | -0.134 | Salicylic_acid_glucopyranoside            | -0.166 |
| A217004_101                    | -0.238 | Raffinose                                 | -0.192 |
| Proline                        | -0.529 | Lysine                                    | -0.197 |

**Supplementary Table 4.** Spearman correlations calculated for correlations of 75 metabolites with HNT sensitivity (expressed as rank of damage by chlorosis, Glaubitz et al. 2014) under control and HNT conditions as well as the log<sub>2</sub> fold change. P-values < 0.05 are given in italic, p-values < 0.01 are given in bold. Metabolites and analytes are sorted alphabetically.

| Metabolite                        | control                   |                 | HNT                       |                 | log <sub>2</sub> FC_MW    |               |
|-----------------------------------|---------------------------|-----------------|---------------------------|-----------------|---------------------------|---------------|
|                                   | correlation coefficient r | p-value         | correlation coefficient r | p-value         | correlation coefficient r | p-value       |
| 2-Piperidinecarboxylic acid       | -0.153                    | 0.481           | 0.251                     | 0.128           | 0.261                     | 0.446         |
| A124002-101                       | -0.219                    | 0.251           | 0.097                     | 0.577           | 0.164                     | 0.614         |
| A140003-101                       | 0.0791                    | 0.42            | 0.174                     | 0.0821          | -0.00699                  | 0.974         |
| A143003-101                       | 0.133                     | 0.175           | 0.0742                    | 0.46            | -0.434                    | 0.15          |
| A148006-101                       | 0.0439                    | 0.655           | 0.23                      | <i>0.0206</i>   | 0.559                     | 0.0547        |
| A159003-101                       | -0.0667                   | 0.496           | 0.262                     | <b>0.00821</b>  | 0.594                     | <i>0.0387</i> |
| A170001-101                       | 0.228                     | <i>0.0187</i>   | -0.00946                  | 0.925           | -0.399                    | 0.189         |
| A174001-101                       | 0.307                     | <b>0.00144</b>  | 0.252                     | <i>0.0111</i>   | 0.217                     | 0.484         |
| A174005-101                       | 0.321                     | <b>0.00093</b>  | 0.257                     | <b>0.00968</b>  | 0.014                     | 0.956         |
| A211001-101                       | 0.131                     | 0.179           | 0.0673                    | 0.503           | -0.0839                   | 0.783         |
| A217004-101                       | 0.133                     | 0.173           | 0.328                     | <b>0.000843</b> | 0.315                     | 0.306         |
| A228001-101                       | 0.154                     | 0.115           | 0.257                     | <b>0.00961</b>  | 0.126                     | 0.683         |
| A237001-101                       | -0.426                    | <b>6.31E-06</b> | 0.128                     | 0.201           | 0.65                      | <i>0.0203</i> |
| A295006-101                       | 0.311                     | <i>0.0142</i>   | 0.0225                    | 0.863           | -0.413                    | 0.173         |
| Adipo-2,6-lactam                  | -1                        | 0.333           | -0.127                    | 0.709           | 1                         | 1             |
| Alanine                           | 0.168                     | 0.0849          | 0.178                     | 0.0754          | -0.021                    | 0.939         |
| Arabitol                          | 0.254                     | <b>0.00882</b>  | 0.18                      | 0.0711          | -0.252                    | 0.415         |
| Ascorbic acid                     | -0.0164                   | 0.884           | -0.128                    | 0.228           | -0.462                    | 0.123         |
| Asparagine                        | -0.306                    | 0.069           | 0.378                     | <b>0.00548</b>  | 0.612                     | 0.0537        |
| Aspartic acid                     | 0.212                     | <i>0.029</i>    | 0.525                     | <b>2.29E-08</b> | 0.65                      | <i>0.0203</i> |
| Cinnamic acid, 4-hydroxy-, trans- | -0.133                    | 0.175           | -0.0367                   | 0.715           | 0.217                     | 0.484         |
| Citric acid                       | 0.0271                    | 0.782           | 0.0215                    | 0.83            | 0.0629                    | 0.834         |
| Dehydroascorbic acid dimer        | 0.155                     | 0.165           | -0.0608                   | 0.569           | -0.322                    | 0.295         |
| Erythritol                        | 0.204                     | <i>0.0365</i>   | 0.0989                    | 0.325           | -0.273                    | 0.377         |
| Erythronic acid                   | 0.178                     | 0.068           | 0.372                     | <b>0.00014</b>  | 0.42                      | 0.165         |
| Ethanolamine                      | 0.0141                    | 0.886           | 0.0534                    | 0.595           | -0.196                    | 0.527         |
| Ferulic acid, trans-              | 0.0631                    | 0.52            | -0.0496                   | 0.622           | -0.441                    | 0.143         |
| Fructose                          | -0.226                    | <i>0.0198</i>   | -0.0171                   | 0.865           | 0.413                     | 0.173         |
| Fructose-6-phosphate              | -0.00937                  | 0.924           | 0.107                     | 0.287           | 0.0979                    | 0.749         |
| Galactaric acid                   | 0.0958                    | 0.371           | 0.305                     | <b>0.00642</b>  | 0.573                     | <i>0.0478</i> |
| Galactinol                        | -0.121                    | 0.353           | 0.0891                    | 0.479           | 0.294                     | 0.34          |
| Galactonic acid                   | -0.169                    | 0.0853          | 0.0664                    | 0.509           | 0.42                      | 0.165         |
| Galactose, 2-deoxy-               | 0.199                     | 0.0567          | 0.119                     | 0.233           | -0.0979                   | 0.749         |
| Gluconic acid                     | -0.276                    | 0.0638          | 0.205                     | 0.137           | 0.864                     | <b>2E-07</b>  |
| Glucose                           | -0.232                    | <i>0.0171</i>   | 0.00273                   | 0.978           | 0.392                     | 0.197         |

| Metabolite                     | control                   |                 | HNT                       |                 | log2FC_MW                 |               |
|--------------------------------|---------------------------|-----------------|---------------------------|-----------------|---------------------------|---------------|
|                                | correlation coefficient r | p-value         | correlation coefficient r | p-value         | correlation coefficient r | p-value       |
| Glucose, 1,6-anhydro           | 0.466                     | <b>6.22E-07</b> | 0.368                     | <b>0.000166</b> | -0.322                    | 0.295         |
| Glucose-6-phosphate            | -0.00945                  | 0.923           | 0.141                     | 0.159           | 0.196                     | 0.527         |
| Glutamic acid                  | 0.11                      | 0.264           | 0.31                      | <b>0.00169</b>  | 0.58                      | <i>0.0446</i> |
| Glutaric acid, 2-oxo-          | 0.0277                    | 0.778           | 0.138                     | 0.169           | 0.252                     | 0.415         |
| Glyceric acid                  | 0.204                     | <i>0.0362</i>   | 0.103                     | 0.305           | -0.112                    | 0.716         |
| Glyceric acid-2-phosphate      | -0.112                    | 0.258           | 0.0741                    | 0.47            | 0.014                     | 0.956         |
| Glyceric acid-3-phosphate      | -0.0766                   | 0.434           | 0.0577                    | 0.566           | 0.392                     | 0.197         |
| Glycerophosphoglycerol         | -0.0824                   | 0.484           | 0.383                     | <b>0.000494</b> | 0.594                     | <i>0.0387</i> |
| Glycine                        | 0.0365                    | 0.71            | 0.408                     | <b>2.61E-05</b> | 0.608                     | <i>0.0333</i> |
| Hexadecanoic acid              | 0.0821                    | 0.402           | 0.0877                    | 0.382           | -0.0769                   | 0.8           |
| Inositol, myo-                 | -0.319                    | <b>0.000906</b> | -0.445                    | <b>3.84E-06</b> | -0.196                    | 0.527         |
| Inositol-1-phosphate           | 0.0321                    | 0.756           | 0.0337                    | 0.74            | -0.021                    | 0.939         |
| Isocitric acid                 | 0.104                     | 0.286           | -0.158                    | 0.115           | -0.462                    | 0.123         |
| Kestose, 1-                    | -0.0961                   | 0.327           | 0.026                     | 0.796           | 0.224                     | 0.47          |
| Lysine                         | -0.047                    | 0.784           | 0.0165                    | 0.916           | 0.382                     | 0.258         |
| Malic acid                     | -0.0495                   | 0.614           | 0.235                     | <i>0.018</i>    | 0.559                     | 0.0547        |
| Nicotinic acid                 | 0.196                     | <i>0.0455</i>   | 0.284                     | <b>0.00406</b>  | 0.0699                    | 0.817         |
| Octadecanoic acid              | 0.106                     | 0.28            | 0.112                     | 0.264           | -0.0559                   | 0.852         |
| Oxalic acid                    | -0.103                    | 0.294           | 0.135                     | 0.178           | 0.58                      | <i>0.0446</i> |
| Phosphoenolpyruvic acid        | 0.0883                    | 0.37            | 0.247                     | <i>0.0137</i>   | 0.245                     | 0.429         |
| Phosphoric acid                | -0.088                    | 0.369           | 0.102                     | 0.309           | 0.287                     | 0.352         |
| Phosphoric acid monomethyl est | 0.172                     | 0.0781          | 0.242                     | <i>0.0151</i>   | 0.273                     | 0.377         |
| Proline                        | 0.347                     | 0.236           | 0.454                     | <b>0.0056</b>   | 0.786                     | <i>0.0251</i> |
| Putrescine                     | 0.0888                    | 0.457           | 0.344                     | <b>0.00228</b>  | 0.35                      | 0.253         |
| Pyridine, 2-hydroxy-           | 0.0902                    | 0.357           | 0.0481                    | 0.633           | -0.21                     | 0.498         |
| Pyridine, 3-hydroxy-           | 0.0757                    | 0.44            | 0.196                     | <i>0.0498</i>   | -0.182                    | 0.557         |
| Pyroglutamic Acid              | 0.236                     | <i>0.0155</i>   | 0.466                     | <b>1.17E-06</b> | 0.636                     | <i>0.0242</i> |
| Quinic acid                    | -0.288                    | <b>0.00288</b>  | -0.102                    | 0.308           | 0.517                     | 0.0795        |
| Raffinose                      | -0.148                    | 0.131           | -0.107                    | 0.286           | -0.042                    | 0.886         |
| Salicylic acid-glucopyranoside | 0.345                     | <b>0.000309</b> | 0.374                     | <b>0.00013</b>  | -0.014                    | 0.956         |
| Serine                         | -0.03                     | 0.759           | 0.529                     | <b>1.59E-08</b> | 0.58                      | <i>0.0446</i> |
| Shikimic acid                  | -0.281                    | <b>0.00364</b>  | -0.166                    | 0.0965          | 0.406                     | 0.181         |
| Shikimic acid, 3-dehydro-      | 0.179                     | 0.0685          | 0.194                     | 0.0526          | 0.301                     | 0.329         |
| Succinic acid                  | 0.12                      | 0.22            | 0.157                     | 0.117           | 0.035                     | 0.904         |
| Threitol                       | 0.185                     | 0.0574          | 0.0719                    | 0.474           | -0.168                    | 0.588         |
| Threonic acid                  | 0.145                     | 0.138           | 0.33                      | <b>0.000778</b> | 0.497                     | 0.0944        |
| Threonine                      | 0.106                     | 0.278           | 0.381                     | <b>0.000112</b> | 0.566                     | 0.0512        |
| Trehalose, alpha,alpha'-       | -0.0014                   | 0.989           | -0.143                    | 0.152           | -0.028                    | 0.921         |
| Uracil                         | -0.159                    | 0.367           | 0.243                     | 0.126           | 0.321                     | 0.346         |
| Valine                         | 0.0524                    | 0.593           | 0.273                     | <b>0.00585</b>  | 0.336                     | 0.273         |

**Supplementary Table 5.** List of genes and putative genes encoding enzymes involved in polyamine biosynthesis in rice. For selection of genes see Do et al. (2013). Annotation of genes is due to the Rice Genome Annotation Project (<http://rice.plantbiology.msu.edu>).

| <b>Name</b>     | <b>Locus TIGR</b> | <b>Annotation TIGR</b>                                                    |
|-----------------|-------------------|---------------------------------------------------------------------------|
| <i>ADC1</i>     | LOC_Os06g04070    | Pyridoxal-dependent decarboxylase protein, putative, expressed            |
| <i>ADC2</i>     | LOC_Os04g01690    | Pyridoxal-dependent decarboxylase protein, putative, expressed            |
| <i>ADC3</i>     | LOC_Os08g33620    | Arginine decarboxylase, putative, expressed                               |
| <i>AIH</i>      | LOC_Os04g39210    | Agmatine deiminase, putative, expressed                                   |
| <i>CPA1</i>     | LOC_Os03g07910    | Nitrilase, putative, expressed                                            |
| <i>CPA2</i>     | LOC_Os06g10420    | Nitrilase, putative, expressed                                            |
| <i>CPA3</i>     | LOC_Os12g31830    | Nitrilase, putative, expressed                                            |
| <i>CPA4</i>     | LOC_Os02g33080    | N-carbamoylputrescine amidase, putative, expressed                        |
| <i>ODC1</i>     | LOC_Os09g37120    | Pyridoxal-dependent decarboxylase protein, putative, expressed            |
| <i>ODC2</i>     | LOC_Os04g04980    | Pyridoxal-dependent decarboxylase protein, putative, expressed            |
| <i>SAMDC1</i>   | LOC_Os02g39795    | S-adenosyl-l-methionine decarboxylase leader peptide, putative, expressed |
| <i>SAMDC2</i>   | LOC_Os04g42095    | S-adenosyl-l-methionine decarboxylase leader peptide, putative, expressed |
| <i>SAMDC4</i>   | LOC_Os09g25625    | S-adenosyl-l-methionine decarboxylase leader peptide, putative, expressed |
| <i>SPD/SPM1</i> | LOC_Os02g14190    | Spermidine synthase, putative, expressed                                  |
| <i>SPD/SPM2</i> | LOC_Os02g15550    | Spermidine synthase, putative, expressed                                  |
| <i>SPD/SPM3</i> | LOC_Os06g33710    | Spermidine synthase, putative, expressed                                  |
| <i>SPD/SPM4</i> | LOC_Os07g22600    | Spermidine synthase, putative, expressed                                  |



**Supplementary Table 7.** Spearman correlation calculated for 17 genes encoding enzymes involved in polyamine biosynthesis with HNT sensitivity (expressed as rank of damage by chlorosis, Glaubitz et al., 2014) under control and HNT conditions as well as the log<sub>2</sub> fold change. P-values < 0.05 are given in italic, p-values < 0.01 are given in bold. Genes are sorted according to their order in polyamine biosynthesis.

| Gene            | control                   |                  | HNT                       |                  | log <sub>2</sub> FC       |                  |
|-----------------|---------------------------|------------------|---------------------------|------------------|---------------------------|------------------|
|                 | correlation coefficient r | p-value          | correlation coefficient r | p-value          | correlation coefficient r | p-value          |
| <i>ADC1</i>     | -0.0998                   | 0.638            | 0.373                     | 0.0717           | 0.429                     | 0.26             |
| <i>ADC2</i>     | -0.464                    | 0.0782           | 0.651                     | <b>0.00183</b>   | 0.738                     | <i>0.0287</i>    |
| <i>ADC3</i>     | -0.336                    | 0.106            | 0.36                      | 0.0829           | 0.738                     | <i>0.0287</i>    |
| <i>AIH</i>      | -0.47                     | <i>0.0205</i>    | -0.468                    | <i>0.0213</i>    | 0.571                     | 0.12             |
| <i>CPA1</i>     | -0.733                    | <b>0.0000002</b> | -0.323                    | 0.121            | 0.929                     | <b>0.0000002</b> |
| <i>CPA2</i>     | -0.368                    | 0.076            | -0.289                    | 0.169            | 0.69                      | <i>0.0474</i>    |
| <i>CPA3</i>     | -0.368                    | 0.076            | -0.407                    | <i>0.048</i>     | 0.571                     | 0.12             |
| <i>CPA4</i>     | -0.208                    | 0.326            | 0.725                     | <b>9.33E-06</b>  | 0.69                      | <i>0.0474</i>    |
| <i>ODC1</i>     | -0.363                    | 0.105            | 0.667                     | <b>0.000339</b>  | 0.786                     | <i>0.0149</i>    |
| <i>ODC2</i>     | -0.254                    | 0.288            | 0.0142                    | 0.951            | 0.6                       | 0.242            |
| <i>SAMDC1</i>   | -0.0762                   | 0.719            | 0.567                     | <b>0.00393</b>   | 0.667                     | 0.0588           |
| <i>SAMDC2</i>   | -0.144                    | 0.496            | -0.835                    | <b>0.0000002</b> | -0.19                     | 0.619            |
| <i>SAMDC4</i>   | -0.236                    | 0.262            | 0.368                     | 0.076            | 0.762                     | <i>0.0212</i>    |
| <i>SPD/SPM1</i> | -0.426                    | <i>0.0381</i>    | 0.129                     | 0.545            | 0.357                     | 0.353            |
| <i>SPD/SPM2</i> | -0.57                     | <b>0.00463</b>   | 0.376                     | 0.0696           | 0.714                     | <i>0.0374</i>    |
| <i>SPD/SPM3</i> | 0.256                     | 0.272            | 0.665                     | <b>0.000369</b>  | 0.167                     | 0.662            |
| <i>SPD/SPM4</i> | -0.488                    | 0.0533           | 0.0725                    | 0.765            | 0.548                     | 0.139            |
